# Supplementary material
Source: Elsevier journal article supplement (https://www.sciencedirect.com/science/article/pii/S1885585721002486)
Supplement: mmc1 [file mmc1.pdf]

**SUPPLEMENTARY DATA**

| Study sites and investigators* |                                                                                                                               |
|--------------------------------|-------------------------------------------------------------------------------------------------------------------------------|
| <i>Code</i>                    | <i>Study site and local principal investigator</i>                                                                            |
| 001                            | Hospital Puerta del Mar, Cádiz<br>Dr. Alejandro Gutiérrez Barrios<br>Dra. Dolores Cañadas                                     |
| 002                            | Hospital Universitario Reina Sofía, Córdoba<br>Dra. Soledad Ojeda<br>Dr. Manuel Pan                                           |
| 003                            | Hospital Universitario Juan Ramón Jiménez, Huelva<br>Dr. José F. Díaz Fernández<br>Dr. Camacho –Freire                        |
| 004                            | Hospital Virgen de las Nieves, Granada<br>Dr. Eduardo Molina                                                                  |
| 005                            | Hospital Universitario Virgen de la Victoria, Málaga<br>Dr. Juan Horacio Alonso Briaies<br>Dr. José María Hernández           |
| 006                            | Hospital Universitario Miguel Servet, Zaragoza<br>Dr. Georgina Fuertes-Ferre                                                  |
| 007                            | Hospital Universitario de Cabueñes, Gijón<br>Dr. Iñigo Lozano                                                                 |
| 008                            | Hospital Universitario Central de Asturias, Oviedo<br>Dr. Pablo Avanzas<br>Dra. Paula Antuña                                  |
| 009                            | Hospital Universitari Son Espases, Palma de Mallorca<br>Dr. Vicente Peral Disdier                                             |
| 010                            | Hospital Universitario de Canarias, San Cristóbal de la Laguna (Tenerife)<br>Dr. Francisco Bosa Ojeda                         |
| 011                            | Hospital Universitario Marqués de Valdecilla, Santander<br>Dr. José M de la Torre Hernández<br>Dra. Gabriela Veiga            |
| 012                            | Complejo Hospitalario Universitario de Albacete, Albacete<br>Dr. Jesús María Jiménez-Mazuecos<br>Dr. Juan José Portero Portaz |
| 013                            | Hospital General Universitario de Ciudad Real, Ciudad Real<br>Dr. Fernando Lozano Ruiz-Poveda                                 |
| 014                            | Hospital General Universitario de Toledo, Toledo<br>Dr. Tomás Cantón Rubio<br>Dr. José Moreu                                  |
| 015                            | Hospital Universitario de León, León<br>Dr. Armando Pérez-de Prado<br>Dr. Miguel Rodríguez Santamarta                         |

|     |                                                                                                                                                                                                                |
|-----|----------------------------------------------------------------------------------------------------------------------------------------------------------------------------------------------------------------|
| 016 | Hospital Universitario de Salamanca, Salamanca<br>Dr. Ignacio Cruz-González                                                                                                                                    |
| 017 | Hospital Clínico Universitario de Valladolid, Valladolid<br>Dr. Ignacio J. Amat-Santos                                                                                                                         |
| 018 | Hospital Germans Trias i Pujol, Badalona<br>Dr. Omar Abdul-Jawad Altisent                                                                                                                                      |
| 019 | Hospital Clinic de Barcelona, Barcelona<br>Dr. Manel Sabaté                                                                                                                                                    |
| 020 | Hospital del Mar, Barcelona<br>Dr. Marcos García-Guimaraes<br>Dra. Helena Tizón                                                                                                                                |
| 021 | Hospital de la Santa Creu i Sant Pau, Barcelona<br>Dr. Marcelo Fabián Jiménez Kockar<br>Dr. Antonio Barros                                                                                                     |
| 022 | Hospital Universitari Vall d'Hebron, Barcelona<br>Dr. Bruno García del Blanco                                                                                                                                  |
| 023 | Hospital Universitari de Bellvitge, L'Hospitalet de Llobregat<br>Dr. Gerard Roura<br>Dr. José Carlos Sánchez Salado                                                                                            |
| 024 | Hospital General Universitario de Alicante, Alicante<br>Dr. Pascual Bordes Siscar<br>Dr. Vicente Mainar                                                                                                        |
| 025 | Hospital Clinic Universitari de València, Valencia<br>Dr. Juan Sanchis Forés<br>Dr. Ernesto Valero                                                                                                             |
| 026 | Hospital La Fe, Valencia<br>Dr. José Luis Díez Gil<br>Dr. Luis Martínez Dolz                                                                                                                                   |
| 027 | Hospital Universitario de Badajoz, Badajoz<br>Dr. Juan Manuel Nogales Asensio<br>Dra. Carmen García Corrales                                                                                                   |
| 028 | Hospital Universitario de Cáceres, Cáceres<br>Dr. Sebastián A. Romani<br>Dr. José Javier Gómez Barrando                                                                                                        |
| 029 | Complejo Hospitalario Universitario A Coruña, A Coruña<br>Dr. Xacobe Flores-Ríos                                                                                                                               |
| 030 | Hospital Clínico Universitario de Santiago, Santiago de Compostela<br>Dra. Ana Belén Cid                                                                                                                       |
| 031 | Hospital Universitario de La Princesa, Madrid<br>Dra. Teresa Bastante, Dr. Fernando Rivero, Dr. Fernando Alfonso, Dra. Gina Paola Mejía, Dr. Francisco Abad, Hortensia de la Fuente, Francisco Sánchez-Madrid. |
| 032 | Hospital Clínico San Carlos, Madrid<br>Dr. Fernando Macaya<br>Dr. Javier Escaned                                                                                                                               |
| 033 | Hospital General Universitario Gregorio Marañón, Madrid<br>Dr. Ricardo Sanz Ruiz.<br>Dr. Francisco Fernández-Avilés                                                                                            |

|     |                                                                                                              |
|-----|--------------------------------------------------------------------------------------------------------------|
| 034 | Hospital Universitario 12 de Octubre, Madrid<br>Dr. Maite Velázquez<br>Dr. Héctor Bueno                      |
| 035 | Hospital Universitario La Paz, Madrid<br>Dr. Santiago Jiménez-Valero                                         |
| 036 | Hospital Universitario Ramón y Cajal, Madrid<br>Dr. Ángel Sánchez-Recalde<br>Dr. Jesús Álvarez               |
| 037 | Hospital Universitario Fundación Jiménez Díaz, Madrid<br>Dr. Juan Antonio Franco Peláez<br>Dr. Borja Ibáñez  |
| 038 | Hospital Universitario Puerta de Hierro, Majadahonda<br>Dr. Arturo García-Touchard<br>Dr. Javier Goicolea    |
| 039 | Hospital Universitario de Torrejón, Torrejón de Ardoz<br>Dr. Eduardo Alegría Barrero<br>Dr. Juan Ruiz García |

\* These investigators belong to the Spanish SCAD “Registry” and have already accepted to participate in the BA-SCAD “Trial”. As discussed, the plan is to incorporate additional sites and investigators.
